# Supplementary material for: Biochemical sensing in graphene-enhanced microfiber resonators with individual molecule sensitivity and selectivity
Source: PubMed Central journal article supplement (PMC6874577; doi:10.1038/s41377-019-0213-3), 2019-11-22
Supplement: 41377_2019_213_MOESM1_ESM.pdf [file 41377_2019_213_MOESM1_ESM.pdf]

---

## Supplementary Information of

### Biochemical sensing in graphene-enhanced microfiber resonators with individual molecule sensitivity and selectivity

#### Supplementary Materials

Section S1. Theoretical and in-principle analysis

Section S2. Fabrication, characterization and sample implementations

Section S3. Additional methods and extended measured results

Fig. S1. Intracavity multiple transverse modes and their beating interference.

Fig. S2. Processing in electronics.

Fig. S3. Gain assisted resolution enhancement.

Fig. S4. Binding competitions.

Fig. S5. Device fabrication and material characterization.

Fig. S6. Additional fluorescence measurement.

Fig. S7. Comparison of fluorescent restoration of extended analytes.

Fig. S8. Beat notes and lock-in traces in sensing.

Fig. S9. Simulated Molecular distributions in the resonator and measurement of the resonator only filled with Rh6G.

Table S1. Estimation of the molecular activities at room temperature

Table S2. Performance of the measurement

Reference [S1]-[S14]

#### Supplementary Notes

##### S1. Theoretical and in-principle analysis

For laser wavelength around 560 nm by using the FRET gain media Rhodamine 6G (Rh6G) solution, the cavity enables multiple transverse modes co-existence. The FSR of a transverse mode is determined by the mode effective index  $n_{eff}$ , relying on both the material and the geometry. Figure S1a shows the cross-section of the fiber calibrated FP resonator, composed by a silica capillary. Diameter of the hollow core is 125  $\mu\text{m}$  and when filled with liquid, the refractive index is  $\approx 1.345$ . The inner wall of the resonator is covered by a layer of prGO, with thickness  $d \approx 100$  nm, and refractive index is 2.2. The silica index is  $\approx 1.45$ . For visible band, such a large cross-sectional area enables multimode transmission. By using finite element method in commercial software *COMSOL Multiphysics*, Figure S1b maps 5 simulated electric field distributions in the cavity, which belong to mode order 1 to 5. On one hand, the higher-order mode has lower field intensity exponentially. On the other hand, each transverse mode has its effective index  $n_{eff}$ . From 1st order mode to 5th order mode, the value of the  $n_{eff}$  decreases by  $5 \times 10^{-5}$ . Therefore, these transverse modes have diverse longitude mode families, determined by the free spectral range,  $\text{FSR} = c/2n_{eff}L$ . In a 4 mm long FP cavity ( $L = 4$  mm), the FSRs of the above 5 order modes are plot in Figure S1c, in a small spectral region (0.3 nm, or  $\approx 300$  GHz).

39 The broad fluorescence excite in all the resonance and they would beat each other, obeying the  
 40 interference relation  $f_{beat} = \Delta f_{mode}$ . For example, the two-mode beating in temporal domain can be  
 41 described as:

$$R \times M1 \times M2 = \cos(2\pi f_1 t + \varphi_1) \cos(2\pi f_2 t + \varphi_2) = \frac{R}{2} (A + B) \quad (1)$$

$$\begin{aligned} A &= \cos(2\pi [f_1 + f_2] t + \varphi_1 + \varphi_2) \\ B &= \cos(2\pi [f_1 - f_2] t + \varphi_1 - \varphi_2) \end{aligned} \quad (2)$$

42 Here  $t$  is the time,  $\varphi_1$  and  $\varphi_2$  are the initial phases, and  $R$  denotes the amplification rate. We call  
 43 the term  $A$  ‘sum frequency carrier’, and the term  $B$  ‘differential frequency envelope’. Varying  
 44 with the frequency, the inter-mode beating due to resonance mismatching are complicated, not  
 45 only determined by the  $n_{eff}$ , but also influenced by the  $L$  and the measurement band, as well as the  
 46 mode competition and nonlinearity [S1].

47 Typically, for wavelength 500 nm to 700 nm, the mode interference based beating frequency  $f_1$ -  
 48  $f_2$  ranges in hundreds of MHz to several GHz. Figure S1c simulates the typical longitude mode  
 49 distributions of the 1st and the 2nd mode in two micrometer space, with different phase velocity.  
 50 Here we note that limited by the  $Q$  factor, resonances have their linewidths, in which signals are  
 51 band-limited. Referring the Fourier transform, the spectral response of  $M1 \times M2$  can be written as  
 52 the convolution integration  $FT(M1) * FT(M2)$ , the beat note has the linewidth equaling to the sum  
 53 of the linewidth of the two optical modes for zero-chirping. Linewidth ( $\Delta\nu$ ) of a resonance is  
 54 determined by the finesse of the resonator, Here  $\rho$  is the fraction that the circulating power left  
 55 after one round-trip,  $f_o = f_1$  or  $f_2$  is the optical frequency.

$$F = \frac{\pi}{2 \arcsin \left[ \frac{1 - \sqrt{\rho}}{2^4 \sqrt{\rho}} \right]} \approx \frac{\pi}{1 - \sqrt{\rho}} \quad (3)$$

$$Q = \frac{F f_o}{FSR} \quad (4)$$

$$\Delta\nu = \frac{f_o}{Q} \quad (5)$$

56 Accordingly, the optoelectronic detection in the prGO based resonator is the tracking of the  
 57 mode-to mode spectral shift in frequency domain. Referring that multimode mode excitation  
 58 physics, the strongest beating interference occurs between the 1st order transverse mode and the  
 59 2nd order transverse mode. Related to the fundamental mode distributed in Gaussian shape  
 60 spatially, the higher order modes have more energy interacting with the prGO film, thus they  
 61 would be more sensitive to the modification of the prGO film. In optics, the molecular

67 absorptions in the prGO modulate the optical dispersion (or the momentums) of the mode [S2].  
68 Refractive index of the prGO with rich functional groups is a bit different from the index of  
69 graphene, which is just determined by its optical conductivity [S3]. When there are external  
70 doping or molecular combinations in the prGO, both the electronic response and the optical  
71 response of the prGO changes, especially considering that the prGO film prepared in solution is  
72 not monolayer. The index modulation is determined by the chemical potential modulation (carrier  
73 launching) and the scale of the absorbed molecules (scattering). Referring the cavity model shown  
74 in Figure S1a, we simplify the analysis by linearizing the refractive index of the prGO  $\Delta n_g$ ,  
75 ranging from 0 to  $4 \times 10^4$ . As a result, effective indexes of the first and the second order mode  $n_{eff,1}$   
76 and  $n_{eff,2}$ , changes respectively around the wavelength 560 nm. We show the calculated result in  
77 the top panel Figure S1e in approximation. This leads to resonance shift correspondingly. The  
78 bottom panel demonstrates the two major resonances for example.

79 Besides the resolvability in electronics, the resolvability of the resonances in optics is the  
80 precondition of the beating. Due to the periodic FSR, the harmonic beat notes appear in spectrum.  
81 Figure S1f shows the schematic distributions. The maximum harmonic range is determined by the  
82  $FSR/2$ . The resolvable limit is that the linewidth of the resonance has to be smaller than the FSR  
83 difference of the two modes at this wavelength ( $\Delta FSR$ ). By using the FEM, Figure S1g simulates  
84 the finesse for the 1st order mode and the 2nd order mode, with a fixed roundtrip cavity  
85 reflectivity ranging from 60% to 90%. Their FSR difference around 560 nm is about 4 GHz. As  
86 Figure S1h shows, another way to avoid spectral overlap is enlarging the  $\Delta FSR$ , for typical 1.4  
87 GHz beating linewidth (30 finesse), the valley-peak ratio decreases gradually with  $\Delta FSR$ .

88  
89 In sensing applications relying on the spectral shift detection, we need to find the beat note  
90 peak. Generally a narrower linewidth is preferable. To promote the spectral resolution, a series of  
91 methods in optics have been used, such as the implementation of ultrahigh  $Q$  resonator enabling  
92 resonance width down to single MHz ( $Q$  in  $10^8$  level), or the excitation of lasers enabling single  
93 kHz resolution. Besides the optical methods, peak tracking and adaptive signal regeneration in  
94 electronics is another powerful tool for signal extraction. The manipulation to extract the central  
95 frequency of the optical beat note is written as

$$96 \quad N = Findpeak \left\langle \int_0^t filter_{LP}(M1 \times M2) dt \right\rangle \quad (6)$$

97 Here  $N$  is the extracted signal,  $Findpeak$  is a function in ESA that search the peak in the detection  
98 band. temporal integration averager can cancel the electronic noise and enhance the SNR.  $Filter_{LP}$   
99 is the low-pass filter, typically limited by the photodetector. Considering a resonator with finesse

100 30 (linewidth at 560 nm  $\approx$  700 MHz), and a typical mode-to-mode spectral distance 10 GHz,  
 101 Figure S2a shows the scheme, then Figure S2b shows the calculated Bode plot response and  
 102 central frequency energy ratio in  $\pm 1$  kHz band. This enables higher spectral resolution, see Fig.  
 103 Figure S2c. For lock-in amplification with bandwidth 125 kHz, further frequency down beating is  
 104 essential. As Figure S2a shows, the second-step beating by using a stable electronic signal  
 105 generator moves signal  $E1$  (central freq. GHz) to  $E2$  (central freq. tens to hundreds kHz), thus the  
 106 intensity gradient in bandwidth of the  $E2$  can be filtered out and amplified by using the lock-in  
 107 amplification scheme. The amplification rate and the lock-in SNR is proportional to the  
 108 integration time. Figure S2d shows the calculated extraction of the spectral shift of a 700 MHz  
 109 width signal, a larger spectral shift brings higher intensity difference at the reference frequency  
 110 (e.g. 100 kHz), and the longer lock-in amplification enables higher SNR. Here we assume the  
 111 signal is in Lorentz shape spectrally. Moreover, during the amplification process, due to the  
 112 narrow filtering effect, noise with frequency out of the window (especially the white noise in  
 113 electronics) is well cancelled.

114 The optical gain helps to enhance the  $Q$  factor in a resonator, via decreasing the optical loss. In  
 115 principle, the  $Q$  factor presents the ratio of the energy stored in the oscillation to the energy  
 116 dissipated per cycle by damping processes. For a resonator below the laser threshold, its  $Q$  factor  
 117 depends on the optical frequency  $f_0$ , the fractional power loss  $\alpha$  per round trip, and the round-trip  
 118 time  $T_R$ :

$$Q = f_0 T_R \frac{2\pi}{\alpha} \quad (7)$$

119 This approximation makes sense when  $\alpha \ll 1$ . We note that the  $Q$  factor varies with different  
 120 modes, which have different  $\alpha$  and  $T_R$ . When assisted by the optical gain, the power loss  $\alpha$  can be  
 121 suppressed, as  $\alpha = \alpha_0/g$ . Here the  $\alpha_0$  is the linear loss in the cold cavity,  $g$  is the gain efficiency  
 122 provided by the spontaneous emission. For 560 nm resonances, Figure S3a plots the calculated  
 123 correlation of the  $Q$  factor and the gain efficiency below the lasing threshold. Referring the  
 124 linewidth- $Q$  relationship, we also show the linewidth suppression assisted by the optical gain in  
 125 Figure S3b. As Figure S3c simulates, such a gain effect in the cavity compensates the loss for the  
 126 resonances, reducing the resonant linewidth, thus helps the resolution enhancement in  
 127 measurements [S4].

129 Due to the lack of high resolution fast tunable laser (MHz) or high resolution (sub GHz) OSA  
 130 for the visible band, we provide the evidence of optical gain assisted sensing by using a similar  
 131 FP cavity with high reflectors (HRs) and erbium ion solution ( $\text{Er}^{3+}\text{Cl}_3$ ) gain media, driven by a  
 132 980 nm high power pump. The  $\text{Er}^{3+}$  gain is not quenchable by the prGO. Besides, a high

133 resolution tunable laser (500 kHz linewidth, 1510 nm to 1590 nm tunable range) scans the  
 134 interferometric spectra. The structure is shown in Figure S3d. Figure S3e plots the evolution  
 135 under varied pump power. In cold cavity, due to low coherence, there is no interference. By  
 136 increasing the pump power, the resonances appear. Moreover, a higher pump enhances both  
 137 higher extinction ratio and higher cavity  $Q$ . Here the HRs are multi-layer DBRs for C band.  
 138

139 In optical sensors, chemical selectivity rely on functionalization in materials typically. To  
 140 realize the fluorescent energy resonance transferring (FRET) based selectivity, we first write the  
 141 binding of Rh6G and the prGO via carboxyl or hydroxyl [S5]

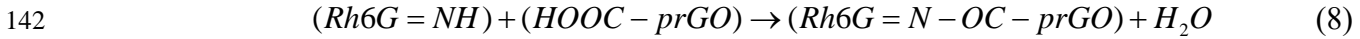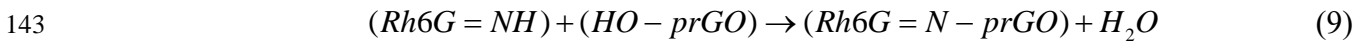

144 This quenches the fluorescence of the Rh6G, or we say the fluorescent resonance energy  
 145 transfers to the prGO. Under critical conditions, external molecules with higher binding energy  
 146 would bind to graphene instead, exchanging the Rh6G molecules out, thus the fluorescence  
 147 restores, which is so-called binding competition [S6]. This process shows chemical selectivity,  
 148 also modulates the refractive index of the prGO in the cavity. A simple way to change the binding  
 149 competition condition of the Rh6G-prGO is tuning the environmental pH value. By preparing pH  
 150 = 2 (acidic) or pH = 8 (alkaline), the Rh6G-prGO would react with dopamine [S7] or nicotine  
 151 [S8] selectively

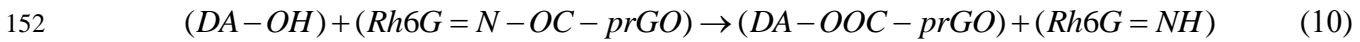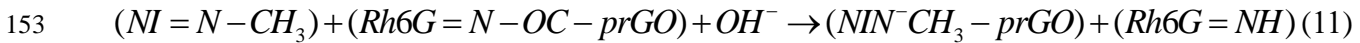

154 Here the DA and NI marks the dopamine and the nicotine. Acidic environment also enables  
 155 avoiding the DA agglomeration. In nicotine-prGO interaction, the nitride keeps trivalence. These  
 156 two chemical interactions are shown in Figure S4a and S4b. Here the target is marked by grey,  
 157 and Rh6G with fluorescent restoration is marked by yellow. Compared to DA and nicotine  
 158 detection, the functionalization to detect ssDNA is a bit more complicated, as shown in Figure  
 159 S4c. A typical method is to utilize metal ion or nanoparticle as the ribonucleic linker [S9]. Thus  
 160 there are two steps in the functionalization and detection process, as the following relationship  
 161 shows. In Eq. (12), the interaction tends to occur in alkaline environment, thus sodium source like  
 162  $Na_2CO_3$  is preferable.

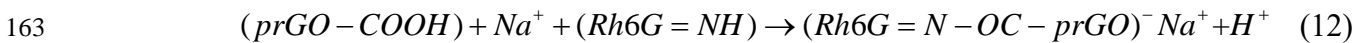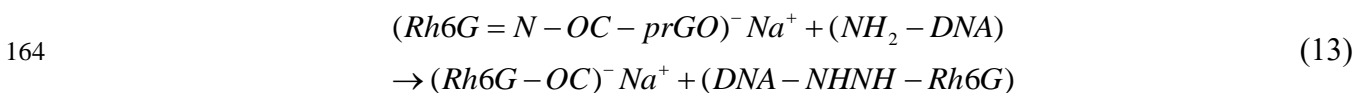

## **S2. Fabrication, characterization and sample implementations**

Figure S5a to S5g show the fabrication flow of our prGO based laser sensor. Standard single-mode silica fibers (core diameter 6  $\mu\text{m}$ , outer diameter 125  $\mu\text{m}$ ) are used to form the FP cavity, enabling fluorescent interference collection. To achieve the higher finesse, silica-air based Fresnel reflection with ratio 4% is sufficient. We enhance the reflectivity in visible band by coating a layer of gold via vacuum sputtering. Further thermal annealing in hydrogen flame is utilized to ensure the mirror uniformity. Thickness of the uniform gold mirror is  $\approx 200$  nm, enabling a maximum reflectivity of 90%. A silica capillary with inner diameter of just 125  $\mu\text{m}$  (tolerance 1  $\mu\text{m}$ ) encapsulates the dye media and the target molecules in aqueous solution. Before fiber calibration, we reduce the GO to be prGO and deposit the prGO film in the cavity. The graphene GO is prepared from natural flake graphite according to modified Hummers' method. Firstly, 5 g amount of graphite and 20 g of  $\text{KMnO}_4$  are immersed and stirred at 35  $^\circ\text{C}$  for 2 h in a 200 mL of concentrated sulfuric acid aqueous solution. Then, 400 mL deionized (DI) water is slowly added into the mixed suspension. The temperature of the suspension is slowly risen and kept at 95  $^\circ\text{C}$ . To reduce the residual  $\text{KMnO}_4$ , 5 mL of  $\text{H}_2\text{O}_2$  is added into the previous mixture when its temperature decreased to 60  $^\circ\text{C}$ . After adding 100 mL of diluted HCl, the few-layer GO is obtained by washing the suspension several times with DI water and freeze drying.

The silica capillary (outer diameter 3mm, length 10 mm) is washed in an ultrasonic bath of deionized water for 30 minutes to ensure the cleanliness and optical scatteringless. Then the capillary is immersed in the GO solution with a tweezers vertically until the solution is absorbed into the cavity due to the siphon effect. Afterwards the capillary full of solution is placed on the heating plate for drying about 2.5 hours slowly. Then, the capillary is introduced into the VC solution, and heated at a temperature of 80 degrees in a water bath for 20 minutes, and then washed in deionized water to clean the excess VC solution. The process last for roughly 2 minutes. Lastly, we place the device on a heating plate for completely drying (1 hour).

By controlling the concentration of GO and the reduction process, the prGO is uniformly distributed on the inner wall without scarceness or blocking. We note that the prGO film is not a single layer sheet. Thus we inserted two fiber end faces coated with highly reflectivity gold film into the capillary cavity, keeping their end faces paralleled in alignment (error in sub angular second level, controlled by the fiber cutter) to form the prGO-based fiber Fabry-perot microcavity. Before the fiber sealing up, the prGO pre baths in the Rh6G (100  $\mu\text{M}$ ) to be the quenched state, via  $\text{H}^+$ ,  $\text{OH}^-$  and  $\text{Na}^+$  functionalization. These  $\text{H}^+/\text{OH}^-$  based functionalization are implemented in the DA/nicotine directly. We use the pH test strips (Mannings, HK) to check the

198 acidity and alkalinity in approximation. For strengthening the DNA link on prGO, we use  
199  $\text{Na}^{2+}\text{CO}_3^{2-}$  with concentration 5% salt-washing the prGO first, pH value in type 3 cavity  $\approx 7$ .

200 Compared to graphene, the prGO is rich of functional groups, which enable highly sensitive  
201 detections, while related to GO, the prGO can keep being film in water, without aqueous  
202 dispersion [S10]. Figure S5h to S5k illustrate the characterizations of the prGO deposited in the  
203 cavity, which is fabricated by using our liquid phase reduction technique. As the Raman spectra  
204 plots, the prGO keeps the Raman shift of the GO, while both the D peak and the G peak of prGO  
205 is narrower than the GO, verifying that the prGO has less defects, for better deposition in the  
206 capillary. The X-ray photoelectron spectra (XPS) of the GO and the prGO also illustrates, the 20  
207 minute reduction doesn't destroy the GO, but change the ratio of C-O and C=O bindings. For the  
208 GO and the prGO, there are three types of bindings majorly, C=C/C-C (284.8 eV), C-O (286.6  
209 eV), and C=O (288.4 eV). Related to GO, the ratio of carbon atom to the oxygen atom increases  
210 from 1.75 to 2.51. In practice, by controlling the reducing time, the reduction degree can be  
211 controlled. Optical pictures show our GO, prGO and rGO samples (reducing time 0 min, 20 min,  
212 60 min) have distinguished colors. Moreover, we also show the XPS characterization of the full  
213 reduction process in Figure S5k. The C:O ratio of rGO is further higher (3.67). It means there are  
214 few functional groups in heavily reduced GO.

215 In our chemical and biochemical materials preparation, all reagents were of analytical reagent  
216 grade and obtained by diluting the stock solution. The R6G powder purchased from J&K  
217 Chemical Co. Ltd. was dissolved in deionized water with concentration of 1 mM as stock solution  
218 and then diluted with DI water to the concentration of 50  $\mu\text{M}$  to 500  $\mu\text{M}$  for measurements. The  
219 dopamine hydrochloride powder was purchased from Yingxin Laboratory and dissolved in DI  
220 water down to 1mM. The nicotine was purchased from Yingxin Laboratory(Shanghai). In this  
221 experiment, nicotine solution was diluted by DI water with the concentration down to 10mg/L,  
222 20mg/L and 40mg/L. The ssDNA(5'-CTC GAC CGA ATT CGT GGC TCT CAT GAC GGA  
223 GA-3') solid was purchased from Sangon Biotech. Co. Inc. and dissolved and diluted by DI water  
224 with concentration ranging from 40  $\mu\text{M}$  to 200 $\mu\text{M}$ . All the reagents were in gradient  
225 configurations for sensing experiment.

### 226 **S3. Additional methods and extended measured results**

228 Figure S6a shows the measured pump absorption spectrum and the gain spectrum of our dye  
229 media (Rh6G), we measure the fluorescent spectrum in 560 nm to 580 nm majorly. Figure S6b  
230 shows the picture of the fiber calibrated FP resonator in the holder, with temperature control,  
231 which helps to suppress the thermal noise. Figure S6c shows the fluorescent quenching of 100

232  $\mu\text{M}$  Rh6G on the prGO, and a typical restoration by using the nicotine (in  $\text{pH} = 8$ ). Generally, the  
233 prGO induced quenching is adequate, with ratio over 20 dB. This enables the selectivity in  
234 principles. In Fig. S6d we demonstrate that the prGO based quenching and restoration efficiency  
235 varies with the concentration of the Rh6G in the pre-implementations. When the concentration of  
236 the Rh6G higher than  $100 \mu\text{M}$ , the prGO cannot fully quench the fluorescence, signals can still be  
237 detectable in the RF spectrum, thus weakens the selectivity. On the other side, when the  
238 concentration of the Rh6G is too low, target adsorption based fluorescent restoration is not  
239 obvious, thus in sensing measurement we cannot see the regenerated signal. Limited by the  
240 photodetector noise, the electronic maximum SNR is  $-50 \text{ dBm}$ , many high-order notes are non-  
241 detectable.

242 We provide more information about the performance of the sensors in practice as well. For  
243 fluorescence based optical devices, bleaching can be a problem that limits its lifetime. During the  
244 pumping process, because the thermal damages or the photon absorptions change the chemical  
245 properties of the dye, the bleaching brings irreversible degradation to the gain media (Rh6G).  
246 Higher laser power brings faster beaching. That is also a reason why we do not use the high  
247 energy pulsed laser pump, nor further increase the resonator  $Q$  to million level, as some rare-earth  
248 ion doped cavity achieved. Figure S6e shows the measured fluorescent spectra duration of the  $100$   
249  $\mu\text{M}$  Rh6G, pumped by the CW  $514 \text{ nm}$  laser with fixed power  $80 \text{ mW}$ . Such a beaching also  
250 reflects in the lock-in amplified trace. Besides, it is known that the fluorescent restoration is  
251  $<100\%$ , typically  $<50\%$  in our cavities, that means the Rh6G molecules attached on the prGO  
252 film is not completely removed from the prGO film. For repeatedly loading Rh6G, limited by this  
253 prGO-Rh6G on-off recoverability, the quenching efficiency decreases. When the prGO is fully  
254 filled by the Rh6G, the sensors cannot perform selectively. For repeatedly target loading, the  
255 fluorescent restoration rate also goes down. Such a result is due to the passivation of the prGO.  
256 The repeatedly measured quenching rates and restoration rates are shown in Figure S6f.

257 In practical applications, biochemical sensors are always in-need to work in mixtures such as  
258 blood serum and urine with other analytes inside. Besides DA, nicotine and ssDNA, we also  
259 investigate the fluorescent restoration performance of our three functionalized types, for  $\text{Na}^+$   
260 (commonly existing in body fluid),  $\text{Cd}^{2+}$  (a typical heavy metal), glucose, ethanol and cholesterol  
261 (typical biomarkers). All the analytes are prepared in aqueous solution. Figure S7a to 7c show the  
262 restoration ratios of Function 1, 2, and 3. Here concentration of  $\text{Na}^+$ ,  $\text{Cd}^{2+}$ , ethanol, glucose, and  
263 cholesterol are  $1 \mu\text{M}$ ,  $1 \mu\text{M}$ ,  $10 \text{ mM}$ ,  $10 \text{ mM}$ , and  $10 \text{ mM}$ , respectively. These numbers are in  
264 relatively high level in blood serum. It reveals that function 1 and 2 would be cross-sensitive to  
265 other materials like glucose, while function 3 shows better identification to their targets. Brief



266 explanation of the results: 1) Function 1 with pH = 2 inhibits ion attachment on prGO due to  
267 excessive H<sup>+</sup> [S10]. 2) Functional groups in glucose, ethanol and cholesterol are majorly methyl  
268 and hydroxyl, which is hard to link on prGO directly. To detect them based on prGO, inducing  
269 metal ions or metal oxides is in-need [S11, S12, S13].

270  
271 After energy integration, find-peak-regeneration and further frequency down mixing by using  
272 the signal generator, we show the RF spectra in sensing processes in Figure S8a to S8c. During  
273 the sensing, we keep the reference electronic signal fixed, we regard the original points at the  
274 fundamental beat note frequencies in the Rh6G filled resonators, without quenching. This  
275 corresponds to the results shown in the main text Fig. 3. Here the small random peaks appear on  
276 the left of the signal are induced by the thermal noise or related mode competitions. Compared to  
277 the RF measurement based on signal regeneration and beating, single molecule tracking asks for  
278 higher resolvability and sensitivity, thus the signal integrates longer in the lock-in amplifier.  
279 Accuracy and reliability of this measurement is determined by the temporal stability in the  
280 sensors [S14]. Helped by the TEC, uncertainty in the cavity and the electronic system is in 10 Hz  
281 level, which also limits the filtering width of the lock-in amplification, allowing maximum  
282 integration time 100 ms. Moreover, determined by the relatively long integration time, it is  
283 difficult for the lock-in measurement to track ultrafast on-off cases of the molecules. Hence we  
284 measure the intra-cavity molecular interaction with quasi-static state, by keeping the cavity  
285 temperature near room temperature. For example, Figure S8d compares the oscilloscopic traces of  
286 the lock-in amplified signal in the free-running system and the thermally stabilized system (288  
287 K), when detecting the molecular dynamics of 2 mM DA. Figure S8e compares the cases when  
288 using several different integration time, under the same temperature (288 K). Either too small  
289 amplification or too long integration hinders the observation of the individual molecule  
290 interaction cases.

291 By using the finite element method, we simulate the quasi-static distributions of the molecules  
292 (2 mM DA, 0.31 μM nicotine, 20 nM ssDNA) in the fluidic resonator, Figure S9a. In the  
293 simulation, molecular distribution in space is determined by the Brownian motion (random  
294 moving) majorly. For quasi static state, the spatial distribution of molecules is uniform in  
295 probability. Compared to the cavity (mm<sup>3</sup>), scale of the target molecules are orders smaller (nm<sup>3</sup>).  
296 We can regard the target molecules as ‘points’ with gravitation approximately. The DA-prGo  
297 bonding is weakest, while the ssDNA-prGO bonding is strongest. In the simulation, we fix the  
298 temperature 288 K. Table S1 illustrates the estimated numbers.

299 Finally, we show the case when there is only Rh6G in the resonator. To enable intermode  
300 interference, we launch sufficient Rh6G (1 mM). Figure S9b illustrates the measurement scheme.  
301 We measure the optical signal collected by the photodetector by using electric power meter  
302 directly, as well as by using the lock-in amplification. Figure S9c plots the measured output  
303 optical power of the resonator. Referring the typical PD gain efficiency 0.2 A/W and dark current  
304 150 nA, the optical power estimates 22  $\mu$ W, with  $Q$  limited FWHM  $\approx$  70 MHz. Fast photonic  
305 quantum fluctuation is not detectable just by using a power meter, but the fluorescent bleaching is  
306 obviously gradual. In the lock-in measurement, the integration time is 1 ms, correspondingly the  
307 effective amplification bandwidth is 1 kHz. Hence we estimate the locked-in optical energy 1874  
308 eV. Hence, referring Figure S9d, the scale in the OSC corresponding to the amplified signal could  
309 be 137 eV/mV in maximum. For 560 nm wavelength ( $\approx$  535.7 THz), single photon energy is  
310 around 2.74 eV. That means, the sensitivity of the lock-in amplification in the OSC can reach 50  
311 photons per mV ideally. Referring the measurement uncertainty 0.2 mV, the lock-in technique  
312 cannot count photon number one-by-one. Table S2 summarizes the discussion above. This  
313 comparison verifies that the discrete steps shown in Fig. 4 are caused by the bonding competition  
314 rather than the intrinsic blink of Rh6G.

### 315 316 **Supplementary References**

- 317 1. Bahl, G., Zehnpfennig, J., Tomes, M. & Carmon, T. Stimulated optomechanical excitation  
318 of surface acoustic waves in a microdevice. *Nat. Commun.* **2**, 403–406 (2011).
- 319 2. Shivananju, B. N. *et al.* The roadmap of graphene-based optical biochemical sensors. *Adv.*  
320 *Funct. Mater.* **27**, 1603918 (2017).
- 321 3. Vakil, A. & Engheta, N. Transformation optics using graphene. *Science* **332**, 1291–1294  
322 (2011).
- 323 4. Chen, W., Özdemir, Ş. K., Zhao, G., Wiersig, J. & Yang, L. Exceptional points enhance  
324 sensing in an optical microcavity. *Nature* **548**, 192–195 (2017).
- 325 5. Loh, K. P., Bao, Q., Eda, G. & Chhowalla, M. Graphene oxide as a chemically tunable  
326 platform for optical applications. *Nat. Chem.* **2**, 1015–1024 (2010).
- 327 6. Roy, R., Hohng, S. & Ha, T. A practical guide to single-molecule FRET. *Nat. Methods* **5**,  
328 507–516 (2008).
- 329 7. Chen, J.-L., Yan, X.-P., Meng, K. & Wang, S.-F. Graphene oxide based photoinduced  
330 charge transfer label-free near-infrared fluorescent biosensor for dopamine. *Anal. Chem.*  
331 **83**, 8787–8793 (2011).

- 332 8. Liu, S.-H., Tang, W.-T. & Yang, Y.-H. Adsorption of nicotine in aqueous solution by a  
333 defective graphene oxide. *Sci. Total Environ.* **643**, 507–515 (2018).
- 334 9. He, S. *et al.* A graphene nanoprobe for rapid, sensitive, and multicolor fluorescent DNA  
335 analysis. *Adv. Funct. Mater.* **20**, 453–459 (2010).
- 336 10. Yao, B. C. *et al.* Partially reduced graphene oxide based FRET on fiber-optic  
337 interferometer for biochemical detection. *Sci. Rep.* **6**, 23706 (2016).
- 338 11. Zhang, Y., Wang, Y., Jia, J. & Wang, J. Nonenzymatic glucose sensor based on graphene  
339 oxide and electrospun NiO nanofibers. *Sensors Actuators B Chem.* **171–172**, 580–587  
340 (2012).
- 341 12. Yi, J., Lee, J. M. & Park, W. II. Vertically aligned ZnO nanorods and graphene hybrid  
342 architectures for high-sensitive flexible gas sensors. *Sensors Actuators B Chem.* **155**, 264–  
343 269 (2011).
- 344 13. Cao, S., Zhang, L., Chai, Y. & Yuan, R. An integrated sensing system for detection of  
345 cholesterol based on TiO<sub>2</sub>–graphene–Pt–Pd hybridnanocomposites. *Biosens. Bioelectron.*  
346 **42**, 532–538 (2013).
- 347 14. Mauranyapin, N. P., Madsen, L. S., Taylor, M. A., Waleed, M. & Bowen, W. P.  
348 Evanescent single-molecule biosensing with quantum-limited precision. *Nat. Photonics* **11**,  
349 477–481 (2017).
- 350
- 351

352

Supplementary Figures and Tables

353

354

355

356

357

358

359

360

361

362

**Fig. S1. Intracavity multiple transverse modes and their beating interference.** **a**, Cross-sectional model of the resonator. **b**, Transverse modes, from order 1 to order 5. **c**, Longitude mode families of the transverse modes. Determined by the linear cavity resonance, intensity of higher order mode is smaller. Here the mode orders are marked. **d**, Spatial longitudinal mode distribution of the 1st mode and the 2nd mode, they have distinguished  $n_{eff}$ , enabling interference spectrally. **e**, Spectral sensitivity of the 1st order mode and the 2nd order mode, the difference brings spectral crossing and dividing. **f**, Mismatched FSR enables harmonic beatings in RF. Considering the inherent linewidth of the beating, wider  $\Delta FSR$  or higher finesse is in need to avoid the spectral overlapping. **g**, By optimizing the quality of the reflectors thus increasing finesse, for fixed  $\Delta FSR$ ,

12

363 beating harmonics are more detectable. **h**, valley-to-peak rate of the beatings, the lower it is  
 364 means the better detectability.  
 365

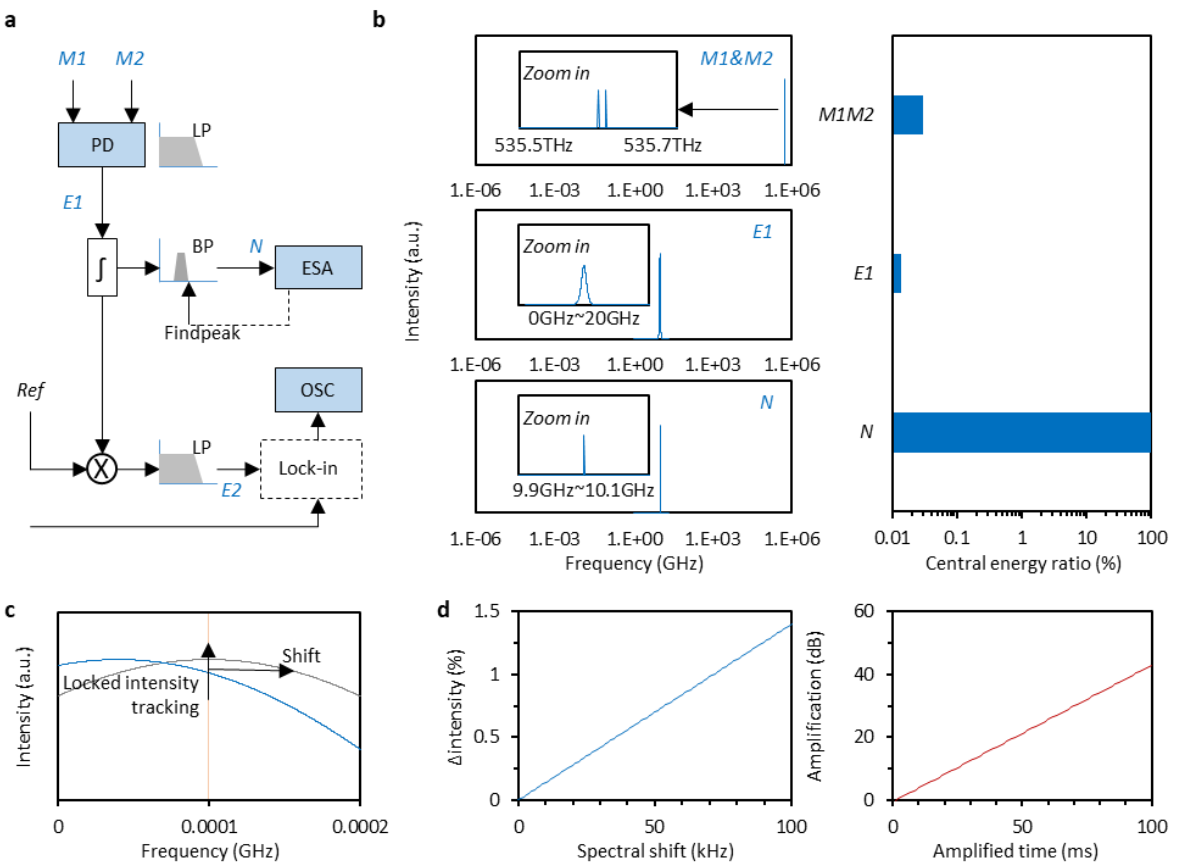

366  
 367 **Fig. S2. Processing in electronics. a**, Scheme of the high resolution beating and lock-in  
 368 amplification. **b**, Spectral moving, from optics to electronics. By finding the peak and  
 369 regenerating the ultranarrow beat note, spectral resolution can be remarkably enhanced. **c**,  
 370 Spectral shift also brings intensity alteration at the fixed frequency in reference (e.g. at 100 kHz).  
 371 **d**, For 700 MHz linewidth beat note, its intensity at the locked frequency changes 1.4% per 100  
 372 kHz shift. Such an alteration can be further amplified over 40 dB in the filter region.  
 373

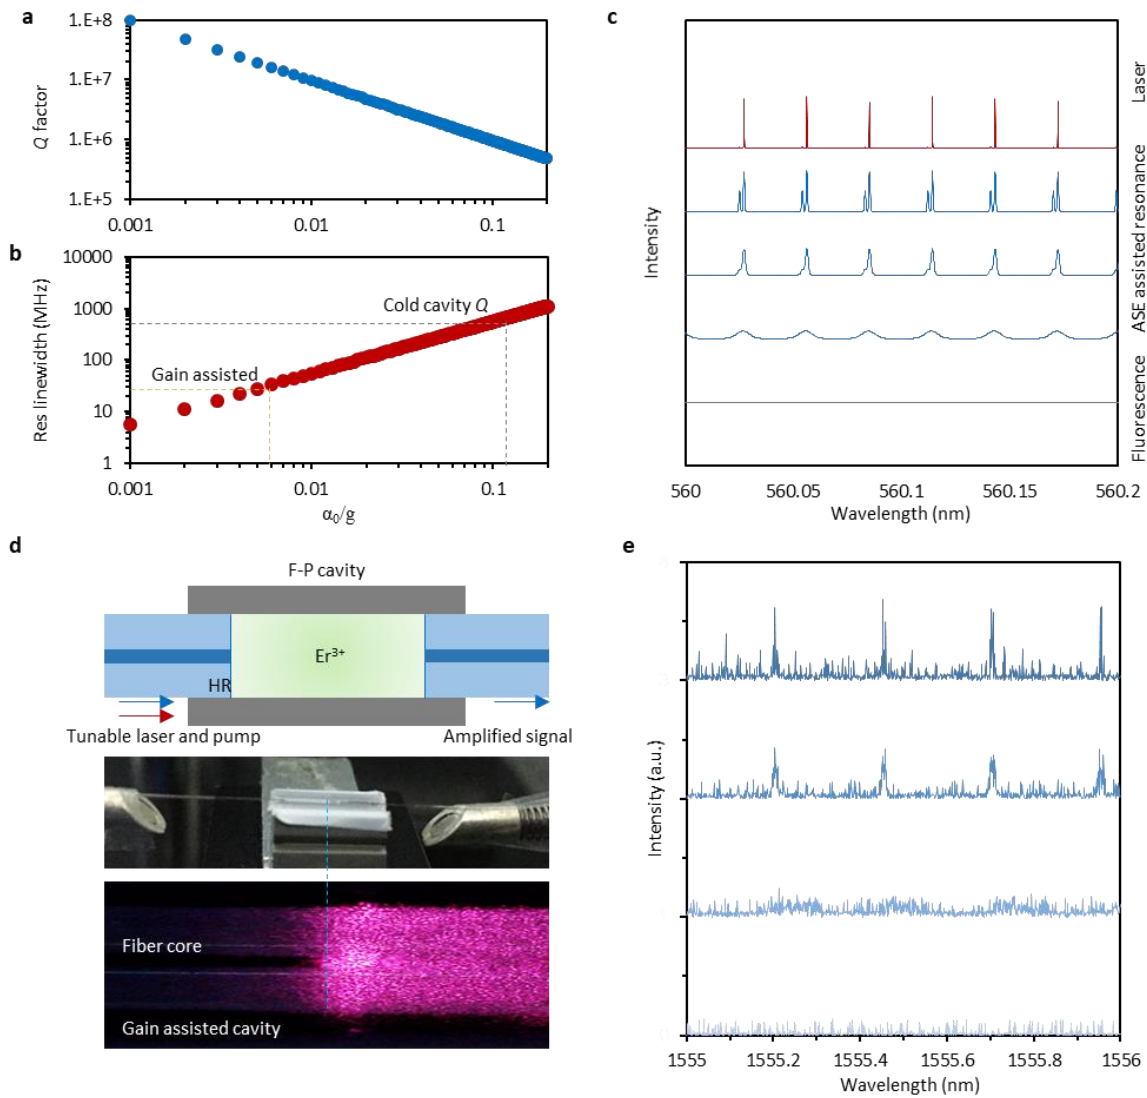

374

375 **Fig. S3. Gain assisted resolution enhancement.** **a**, By increasing the optical gain, the  $Q$  factor  
 376 boosts. **b**, Correspondingly, by increasing the optical gain, the resonance linewidth can be  
 377 suppressed by orders. **c**, By increasing the gain via boosting the pump power, resonances can be  
 378 enhanced, calculated in visible band. **d**, Measuring the optical interference in a Er<sup>3+</sup> based cavity,  
 379 by using the high resolution (500 kHz linewidth) tunable laser in C band. **e**, Results show that the  
 380 optical gain compensates loss of the open cavity, enabling the resonances via increasing the  
 381 effective  $Q$ .

382

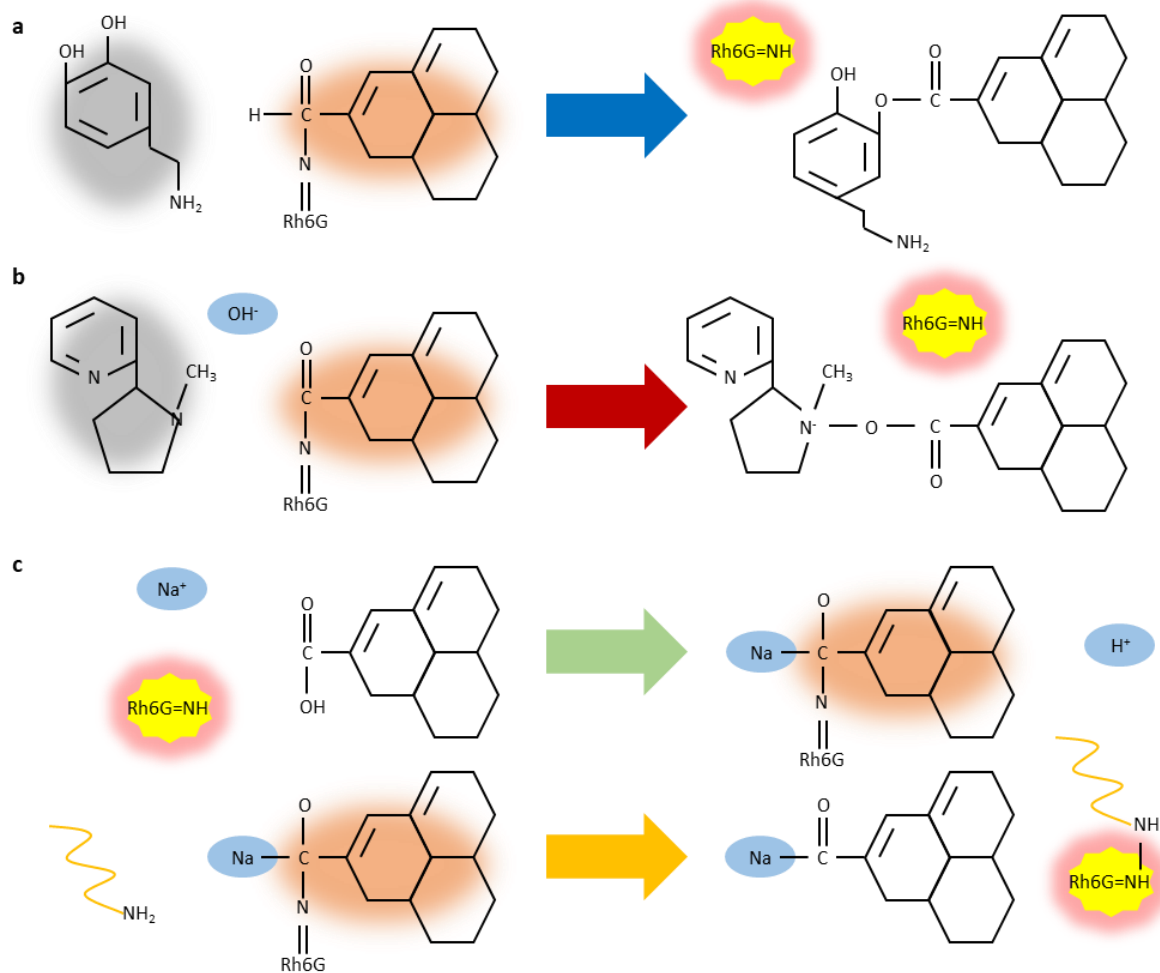

383

384

385

386

387

**Fig. S4. Binding competitions. a**, DA and prGO/Rh6G in acidic presetting. **b**, Nicotine and prGO/Rh6G in alkaline presetting, **c**, Functionalization of the Na<sup>+</sup>/prGO<sup>-</sup>/Rh6G, and the further FRET releasing Rh6G to the ssDNA.

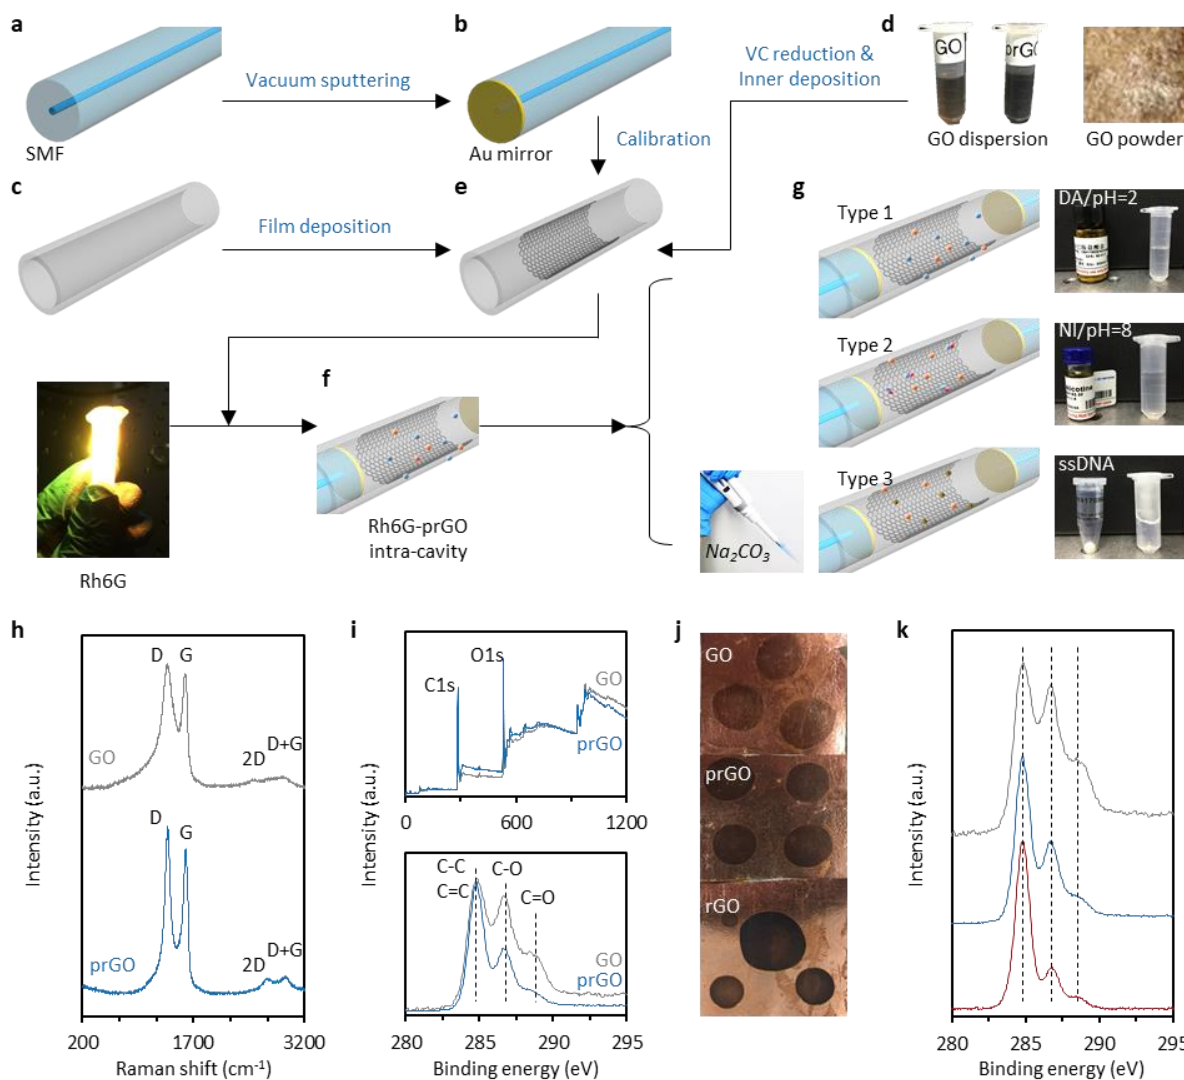

388  
 389 **Fig. S5. Device fabrication and material characterization.** **a**, Optical fiber. **b**, Au coating on  
 390 the fiber end. **c**, Silica capillary. **d**, GO dispersion preparation and partial reduction. **e**, prGO  
 391 deposition in the capillary. **f**, Rh6G deposited in the prGO based cavity. **g**,  $H^+/OH^-/Na^+$   
 392 functionalization enables 3 types of sensors for DA, nicotine and ssDNA detection. **h**, Raman  
 393 spectra, **i**, XPS spectra in band 0 to 1200 eV and 280 to 295 eV, showing that the reduction  
 394 works. **j**, Pictures of the GO, prGO, and rGO deposited on copper foil. Their color represents their  
 395 reduction degree. **k**, XPS of GO, prGO, and rGO.



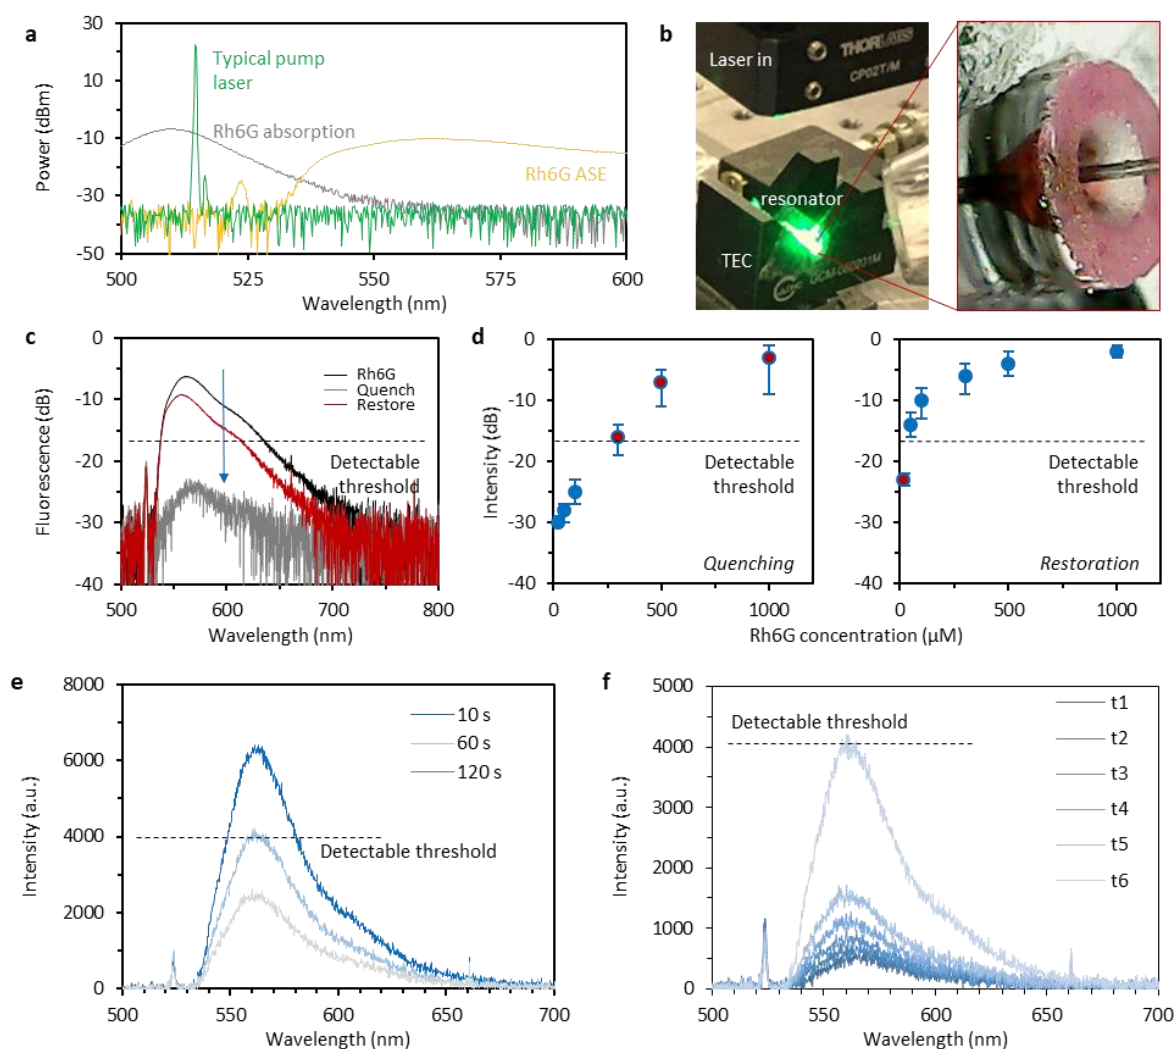

**Fig. S6. Additional fluorescence measurement.** **a**, the absorption and gain band of the Rh6G.

We use a 514 nm CW pump laser for the fluorescent resonance generation. **b**, Picture of the F-P cavity in a holder, which is illuminated by the green laser pump, and well temperature controlled.

**c**, Typical spectra of the fluorescence, the prGO in the capillary can fully quench 100  $\mu\text{M}$  Rh6G,

with quenched intensity 20 dB lower. **d**, The concentration of the Rh6G in pre-implementation influences the experimental effect. To achieve both good quenching and restoration for

selectivity, we use 100  $\mu\text{M}$  Rh6G in the fabrication. **e**, Bleaching wherein the fluorescent intensity

decays gradually. **f**, With repeated use the quenching efficiency decreases. The sensor loses its

selectivity after 6 times reloading.

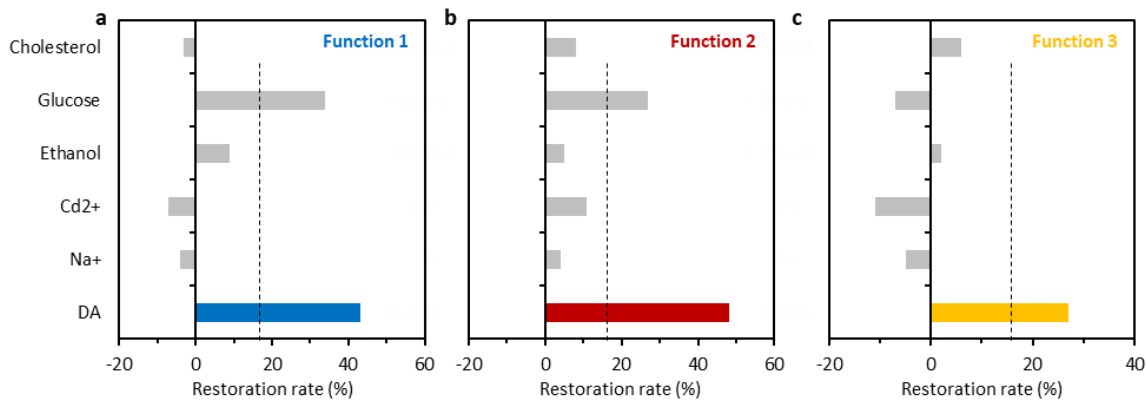

**Fig. S7. Comparison of fluorescent restoration of extended analytes.** The investigated biochemical molecules are  $\text{Na}^+$ ,  $\text{Cd}^{2+}$ , ethanol, glucose, and cholesterol. **a, b, and c** shows fluorescent counts under the same Rh6G concentration 100  $\mu\text{M}$ , in Function 1, 2 and 3 respectively. Here the dashed line indicates the detectable threshold for optoelectronic heterodyne beating.

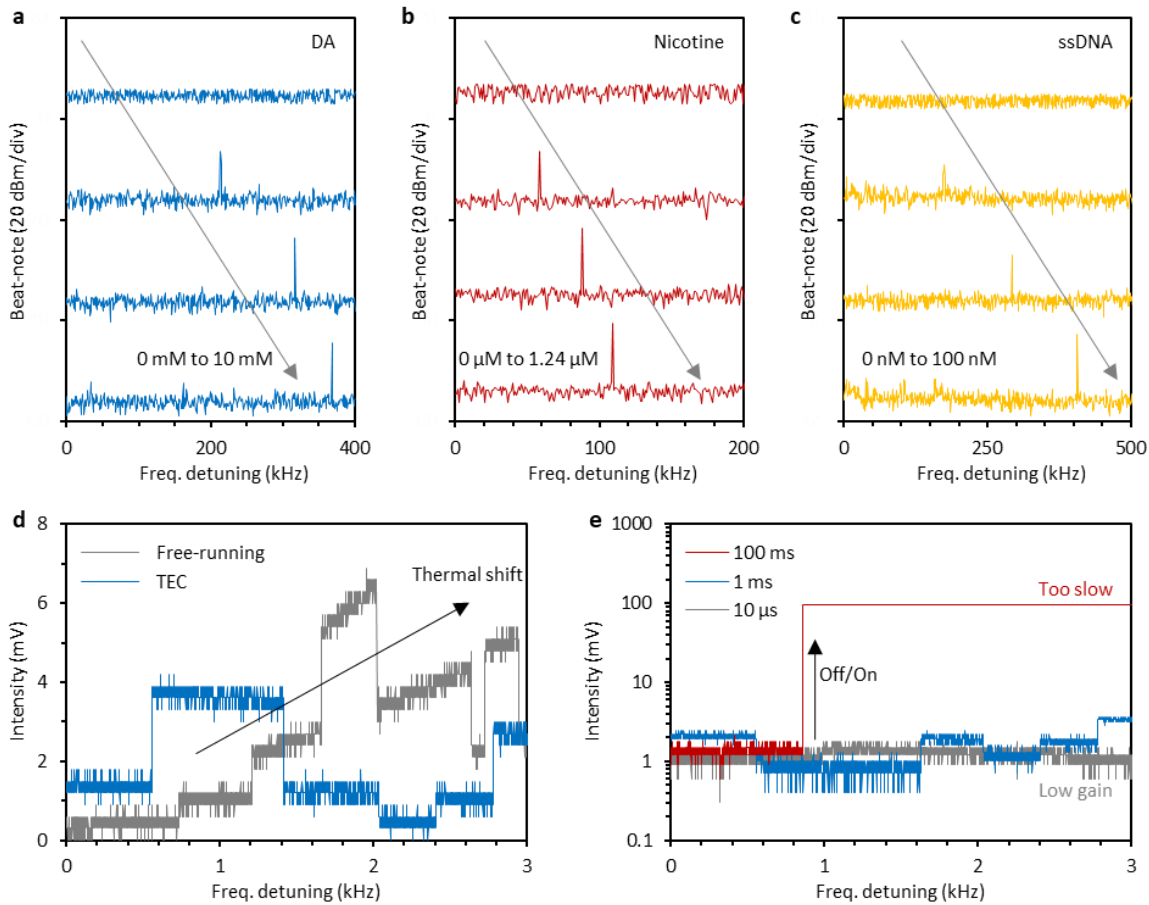

**Fig. S8. Beat notes and lock-in traces in sensing.** **a**, DA detection, by using sensors with function 1. **b**, Nicotine detection, by using sensors with function 2. **c**, ssDNA detection, by using sensors with function 3. The results meet the map shown in Fig. 3. **d**, Comparison of the free-

running sensor and the thermally stabilized sensor. Although the inter-mode interference is insensitive to the temperature in principle, the thermal shift in the material and the electronics would be amplified by the lock-in amplification. **e**, Comparison of different amplification rate. Proper amplification rate with proper speed is essential for tracking the molecular dynamics.

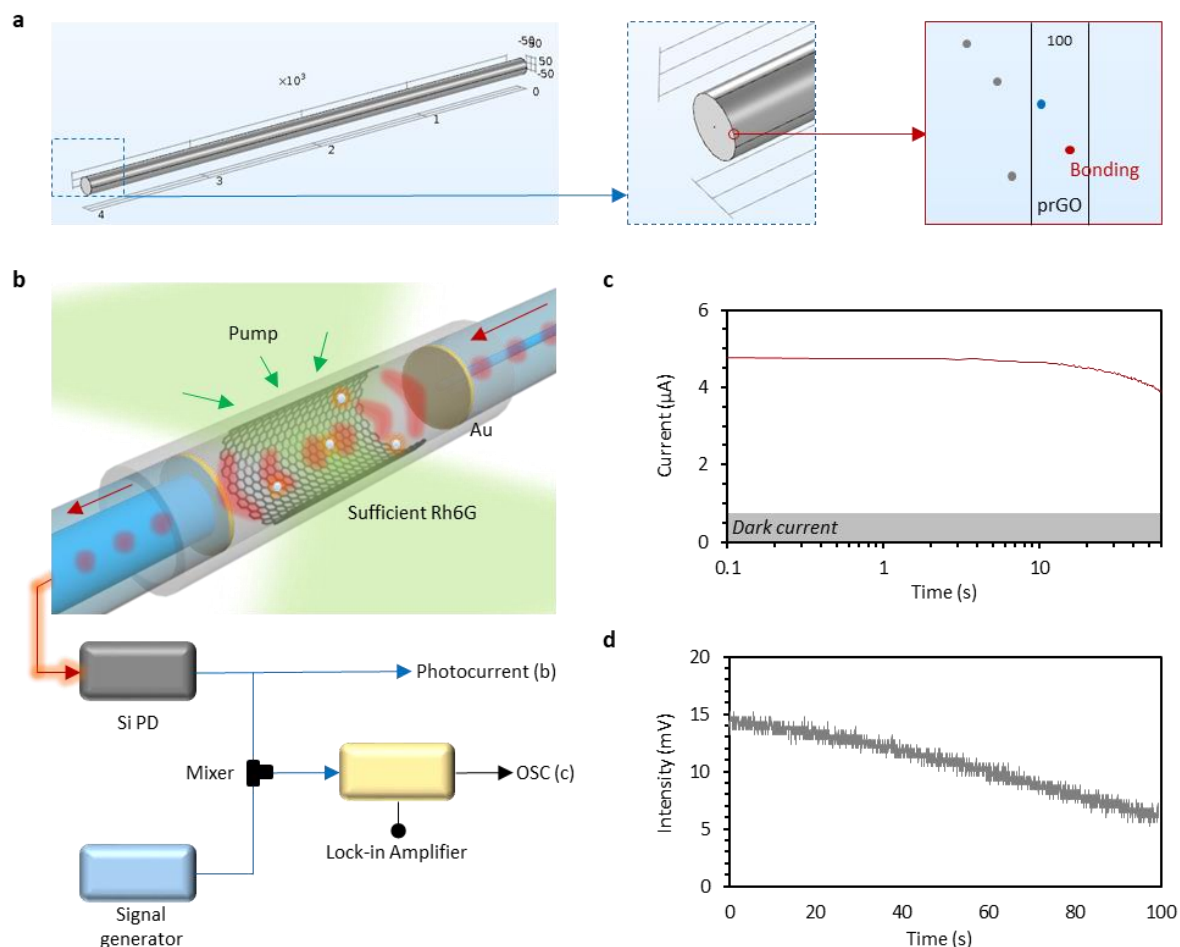

**Fig. S9. Simulated Molecular distributions in the resonator and measurement of the resonator only filled with Rh6G. a**, Simulation: Modelling and zoom-in. We implement the particle dynamics in commercial software *COMSOL Multiphysics*. **b**, Scheme and set-up measuring the Rh6G response only. **c**, Measured photocurrent in 1 minute duration. **d**, Temporal trace after the down-mixing and lock-in amplification.

**Table S1. Estimation of the molecular activities at room temperature**

|                 | <b>Number of molecules in cavity</b> | <b>Estimated number of molecules defusing onto the prGO</b> | <b>Estimated number of molecules bonded on the prGO</b> | <b>Estimated number of target-Rh6G bonding competition <i>per</i> min</b> |
|-----------------|--------------------------------------|-------------------------------------------------------------|---------------------------------------------------------|---------------------------------------------------------------------------|
| <b>DA</b>       | $6 \times 10^{13}$                   | $1.8 \times 10^{11}$                                        | $1.1 \times 10^4$                                       | 130                                                                       |
| <b>Nicotine</b> | $9 \times 10^9$                      | $2.7 \times 10^7$                                           | $1.2 \times 10^4$                                       | 70                                                                        |
| <b>ssDNA</b>    | $5 \times 10^8$                      | $1.5 \times 10^6$                                           | $6 \times 10^3$                                         | 30                                                                        |

434

435

436

**Table S2. Performance of the measurement**

|                                                                            | <b>Direct optoelectronic measurement</b> | <b>Filtering and lock-in amplification</b> |
|----------------------------------------------------------------------------|------------------------------------------|--------------------------------------------|
| <b>Theoretical photonic intensity sensitivity</b>                          | $1.14 \times 10^4$ photons per nA        | 50 photons per mV                          |
| <b>Detect resolution</b>                                                   | 10 nA                                    | 0.1 mV                                     |
| <b>Integration time</b>                                                    | 0.1 s                                    | 0.001 s                                    |
| <b>Rh6G quantum fluctuation (per photon)</b>                               | $10^{-4}$ nA, Non-detectable             | 0.02 mV, Non-detectable                    |
| <b>DA induced increment <i>via spectral shift</i> (per molecule)</b>       | Non-detectable                           | 0.3 mV                                     |
| <b>Nicotine induced increment <i>via spectral shift</i> (per molecule)</b> | Non-detectable                           | 0.5 mV                                     |
| <b>ssDNA induced increment <i>via spectral shift</i> (per molecule)</b>    | Non-detectable                           | 2.4 mV                                     |

437
